# Supplementary material for: An email-based survey of practice regarding hemodynamic monitoring and management in children with septic shock in China
Source: PubMed Central journal article supplement — Transl Pediatr. 2021 Mar;10(3):587–97. doi: 10.21037/tp-20-374 (PMC8039781; doi:10.21037/tp-20-374), 2021-03
Supplement: tp-10-03-587-rc.pdf [file tp-10-03-587-rc.pdf]

## Quality assessment criteria for survey research reports

| Category                  | Item                                                                                                                                                                                                                       | Reported on Page Number/Line Number | Reported on Section/Paragraph |
|---------------------------|----------------------------------------------------------------------------------------------------------------------------------------------------------------------------------------------------------------------------|-------------------------------------|-------------------------------|
| <b>Title and abstract</b> |                                                                                                                                                                                                                            |                                     |                               |
|                           | Is the design of the study stated in the title and/or abstract?                                                                                                                                                            |                                     |                               |
| <b>Introduction</b>       |                                                                                                                                                                                                                            |                                     |                               |
|                           | a) Is there an explanation of why the research is necessary, placing the study in context of previous work in relevant fields?                                                                                             |                                     |                               |
|                           | b) Is the purpose or aim of the paper explained?                                                                                                                                                                           |                                     |                               |
| <b>Methods</b>            |                                                                                                                                                                                                                            |                                     |                               |
| Research tool             | a) Is the questionnaire described?                                                                                                                                                                                         |                                     |                               |
|                           | b) If an existing tool was used, are its psychometric properties presented?                                                                                                                                                |                                     |                               |
|                           | c) If an existing tool was used, are references to the original work provided?                                                                                                                                             |                                     |                               |
|                           | d) If a new tool was used, are the procedures used to develop and pre-test provided?                                                                                                                                       |                                     |                               |
|                           | e) If a new tool was used, have its reliability and validity been reported?                                                                                                                                                |                                     |                               |
|                           | f) Is a description of the scoring procedures provided?                                                                                                                                                                    |                                     |                               |
| Sample selection          | a) Is there a description of the survey population and the sample frame used to identify this population?                                                                                                                  |                                     |                               |
|                           | b) Do the authors provide a description of how representative the sample is of the underlying population?                                                                                                                  |                                     |                               |
|                           | c) Is a sample size calculation or rationale/justification for the sample size presented?                                                                                                                                  |                                     |                               |
| Survey administration     | a) Mode of administration?                                                                                                                                                                                                 |                                     |                               |
|                           | b) Do the authors provide information on the type of contact and how many attempts were made to contact subjects (i.e., prenotification by letter or telephone, reminder postcard, duplicate questionnaire with reminder)? |                                     |                               |
|                           | c) Do the authors report whether incentives were provided (financial or other)?                                                                                                                                            |                                     |                               |
|                           | d) Is there a description of who approached potential participants (e.g., identification of who signed the covering letter)?                                                                                               |                                     |                               |

|                                   |                                                                                                            |  |  |
|-----------------------------------|------------------------------------------------------------------------------------------------------------|--|--|
| Analysis                          | a) Is the method of data analysis described?                                                               |  |  |
|                                   | b) Do the authors provide methods for analysis of nonresponse error?                                       |  |  |
|                                   | c) Is the method for calculating response rate provided?                                                   |  |  |
|                                   | d) Are definitions provided for complete versus partial completions?                                       |  |  |
|                                   | e) Are the methods for handling item missing data provided?                                                |  |  |
| <b>Results</b>                    |                                                                                                            |  |  |
|                                   | a) Is the response rate reported?                                                                          |  |  |
|                                   | b) Are all respondents accounted for?                                                                      |  |  |
|                                   | c) Is information given on how nonrespondents differ from respondents?                                     |  |  |
|                                   | d) Are the results clearly presented?                                                                      |  |  |
|                                   | e) Do the results address the objective(s)?                                                                |  |  |
| <b>Discussion</b>                 |                                                                                                            |  |  |
|                                   | a) Are the results summarized with reference to the study objectives?                                      |  |  |
|                                   | b) Are the strengths of the study stated?                                                                  |  |  |
|                                   | c) Are the limitations of the study (taking into account potential sources of bias or imprecision) stated? |  |  |
|                                   | d) Is there explicit discussion of the generalizability (external validity) of the results?                |  |  |
| <b>Ethical quality indicators</b> |                                                                                                            |  |  |
|                                   | a) Study funding reported?                                                                                 |  |  |
|                                   | b) Research Ethics Board (REB) review reported?                                                            |  |  |
|                                   | c) Reporting of subject consent procedures?                                                                |  |  |
